# Supplementary material for: β-cell insulin receptor deficiency during in utero development induces an islet compensatory overgrowth response
Source: PubMed Central journal article supplement (PMC5216695; doi:10.18632/oncotarget.10342), 2016-06-30
Supplement: oncotarget-07-44927-s001.pdf [file oncotarget-07-44927-s001.pdf]

## β-cell insulin receptor deficiency during *in utero* development induces an islet compensatory overgrowth response

### Supplementary Material

**Supplementary Table 1: List of Primers used for Polymerase Chain Reactions**

| Primer Name     | Primer Pair Sequence                      |
|-----------------|-------------------------------------------|
| <i>oIMR6765</i> | 5' - GAT GTG CAC CCC ATG TCT G - 3'       |
| <i>oIMR6766</i> | 5' - CTG AAT AGC TGA GAC CAC AG - 3'      |
| <i>MIP</i>      | 5' - CCT GGC GAT CCC TGA ACA TGT CCT - 3' |
| <i>CreER</i>    | 5' - TGG ACT ATA AAG CTG GTG GGC AT - 3'  |

**Supplementary Table 2: List of Antibodies used for Immunostaining and Western-Blot Analyses**

| Primary Antibodies              |                       | Dilution        | Company                                        |
|---------------------------------|-----------------------|-----------------|------------------------------------------------|
| Anti-Akt                        | Rabbit polyclonal     | 1:3000*         | Cell Signaling (Temecula, CA, USA)             |
| Anti-Calnexin                   | Mouse monoclonal      | 1:1500*         | BD Biosciences (Missauga, ON, CA)              |
| Anti-Caspase 3                  | Rabbit polyclonal     | 1:1000*         | Cell Signaling (Temecula, CA, USA)             |
| Anti-cleaved Caspase-3 (Asp175) | Rabbit polyclonal     | 1:200 / 1:1000* | Cell Signaling (Temecula, CA, USA)             |
| Anti-GAPDH                      | Rabbit polyclonal     | 1:2000*         | Santa Cruz Biotechnology (Santa Cruz, CA, USA) |
| Anti-Glucagon                   | Rabbit polyclonal     | 1:50            | Santa Cruz Biotechnology (Santa Cruz, CA, USA) |
| Anti-Glut2                      | Rabbit polyclonal     | 1:100           | Chemicon (Temecula, CA, USA)                   |
| Anti-Igf1                       | Rabbit polyclonal     | 1:200           | Abcam (Cambridge, MA, USA)                     |
| Anti-Igf1rβ                     | Rabbit polyclonal     | 1:200           | Cell Signaling (Temecula, CA, USA)             |
| Anti-Igf2                       | Rabbit polyclonal     | 1:200 / 1:1000* | Abcam (Cambridge, MA, USA)                     |
| Anti-Insulin                    | Guinea pig polyclonal | 1:50            | Zymed (San Francisco, CA, USA)                 |
| Anti-Insulin                    | Mouse monoclonal      | 1:800           | Sigma-Aldrich (St. Louis, MO, USA)             |
| Anti-Insulin                    | Rabbit polyclonal     | 1:50            | Santa Cruz Biotechnology (Santa Cruz, CA, USA) |
| Anti-Insulin Receptor           | Mouse monoclonal      | 1:200 / 1:1000* | Millipore (Temecula, CA, USA)                  |
| Anti-Islet1                     | Mouse monoclonal      | 1:100           | DSHB (University of Iowa, Iowa City, IA, USA)  |
| Anti-Ki67                       | Rabbit polyclonal     | 1:100           | Abcam (Cambridge, MA, USA)                     |
| Anti-MafA                       | Rabbit polyclonal     | 1:100           | Bethyl Laboratory (Montgomery, TX, USA)        |
| Anti-Nkx6.1                     | Mouse monoclonal      | 1:100           | DSHB (University of Iowa, Iowa City, IA, USA)  |
| Anti-p53                        | Mouse monoclonal      | 1:2000*         | Cell Signaling (Temecula, CA, USA)             |
| Anti-pan-Cytokeratin            | Mouse monoclonal      | 1:50            | Santa Cruz Biotechnology (Santa Cruz, CA, USA) |

|                              |                   |                    |                                                                      |
|------------------------------|-------------------|--------------------|----------------------------------------------------------------------|
| Anti-Pdx-1                   | Rabbit polyclonal | 1:800              | USA)<br>Dr. Wright (University of Vanderbilt,<br>Nashville, TN, USA) |
| Anti-PECAM-1                 | Rabbit polyclonal | 1:50               | Santa Cruz Biotechnology (Santa Cruz, CA,<br>USA)                    |
| Anti-phospho-Akt<br>(Ser473) | Mouse monoclonal  | 1:2000*            | Cell Signaling (Temecula, CA, USA)                                   |
| Anti-phospho-p53<br>(Ser15)  | Rabbit polyclonal | 1:1000*            | Cell Signaling (Temecula, CA, USA)                                   |
| Anti-Vegf-a                  | Rabbit polyclonal | 1:100 /<br>1:1000* | Abcam (Cambridge, MA, USA)                                           |
| Anti-β-actin                 | Mouse monoclonal  | 1:5000*            | Sigma-Aldrich (St. Louis, MO, USA)                                   |

---

\* dilution factor applied to western blot analysis. DSHB, Developmental Studies Hybridoma

Bank.JRL,

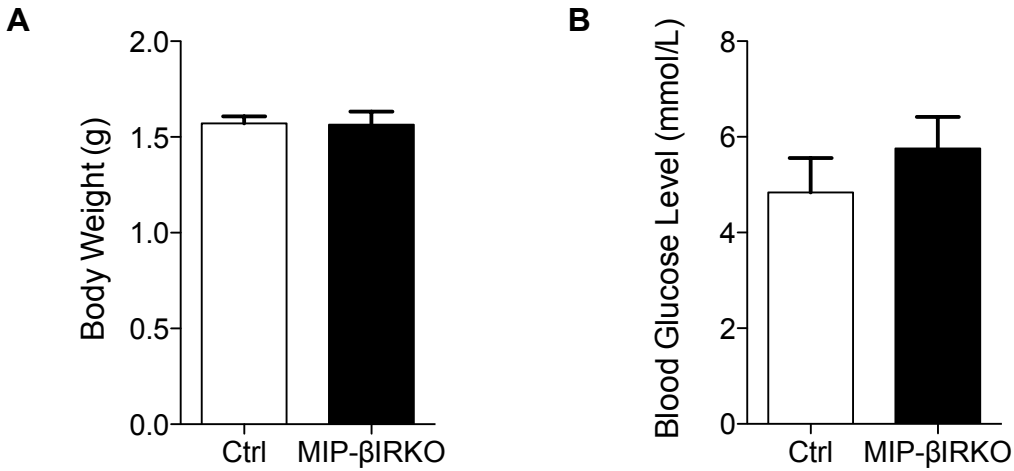

**Supplementary Figure 1: Body weight and blood glucose levels in fetal MIP-βIRKO and control mice at e19-20.** Body weight (A, n=16-18) and blood glucose levels (B, n=5-11) were measured at the time of fetal dissection. Quantification shows that fetal MIP-βIRKO mice displayed normal phenotypes comparable to control mice.

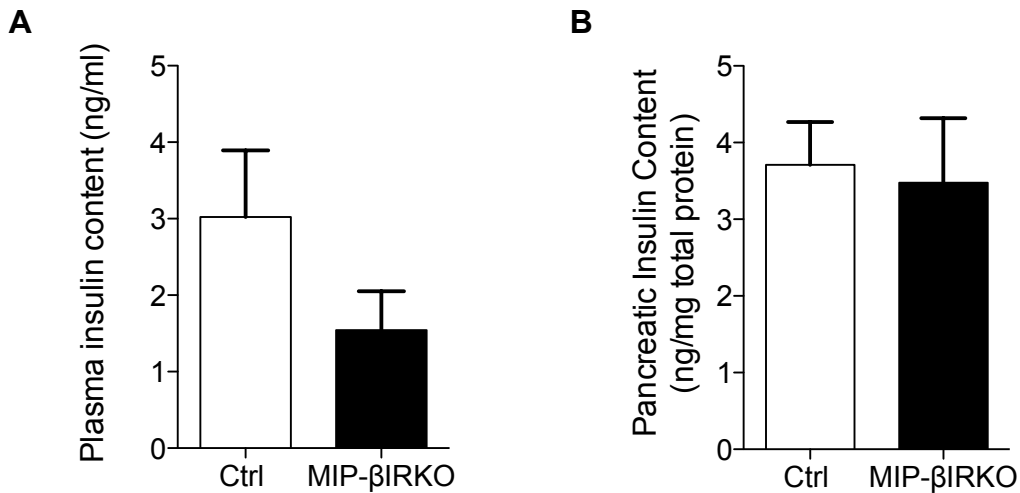

**Supplementary Figure 2: Plasma insulin levels and pancreatic insulin content in fetal MIP-βIRKO and control mice at e19-20.** Insulin levels were collected from plasma (A) and pancreatic (B) samples (n=3) at the time of fetal dissection. Similar circulating and pancreatic insulin content were found in fetal MIP-βIRKO mice compared to their control.

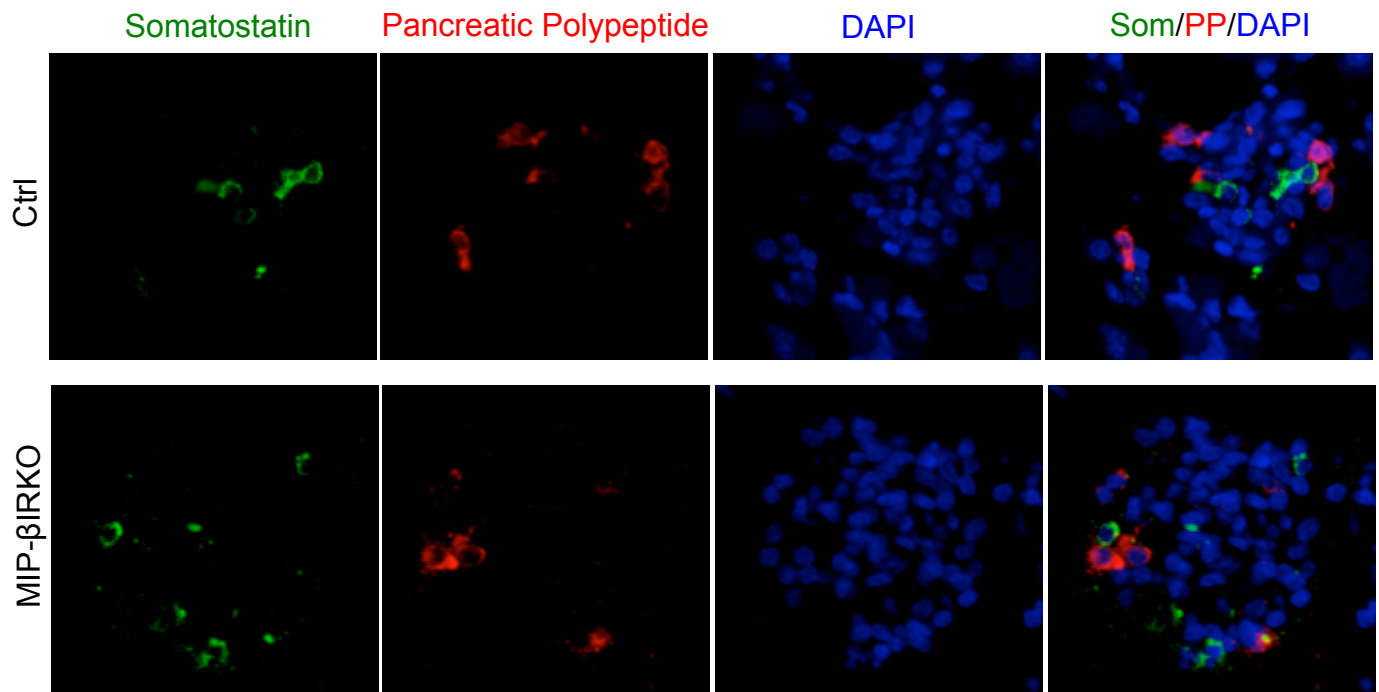

**Supplementary Figure 3:** Double immunostaining for somatostatin and pancreatic polypeptide in fetal MIP- $\beta$ IRKO and control mice at e19-20.
